# Supplementary material for: Thiolated eggshell membranes sorb and speciate inorganic selenium
Source: Royal Society of Chemistry journal article supplement (doi:10.1039/c0an00480d), 2010-09-29
Supplement: c0an00480d.pdf [file c0an00480d.pdf]

## **Thiolated Eggshell Membranes Sorb and Speciate Inorganic Selenium**

Ting Yang<sup>1</sup>, Ming-Li Chen<sup>1</sup>, Xian-Wei Hu<sup>2</sup>, Zhao-Wen Wang<sup>2</sup>, Jian-Hua Wang<sup>1\*</sup>, Purnendu K. Dasgupta<sup>3\*</sup>

<sup>1</sup> Research Center for Analytical Sciences, Box 332, Northeastern University, Shenyang 110819, China

<sup>2</sup> College of Material and Metallurgy, Northeastern University, Shenyang 110819, China

<sup>3</sup> Department of Chemistry and Biochemistry, The University of Texas at Arlington  
Arlington, TX 76019-0065, USA

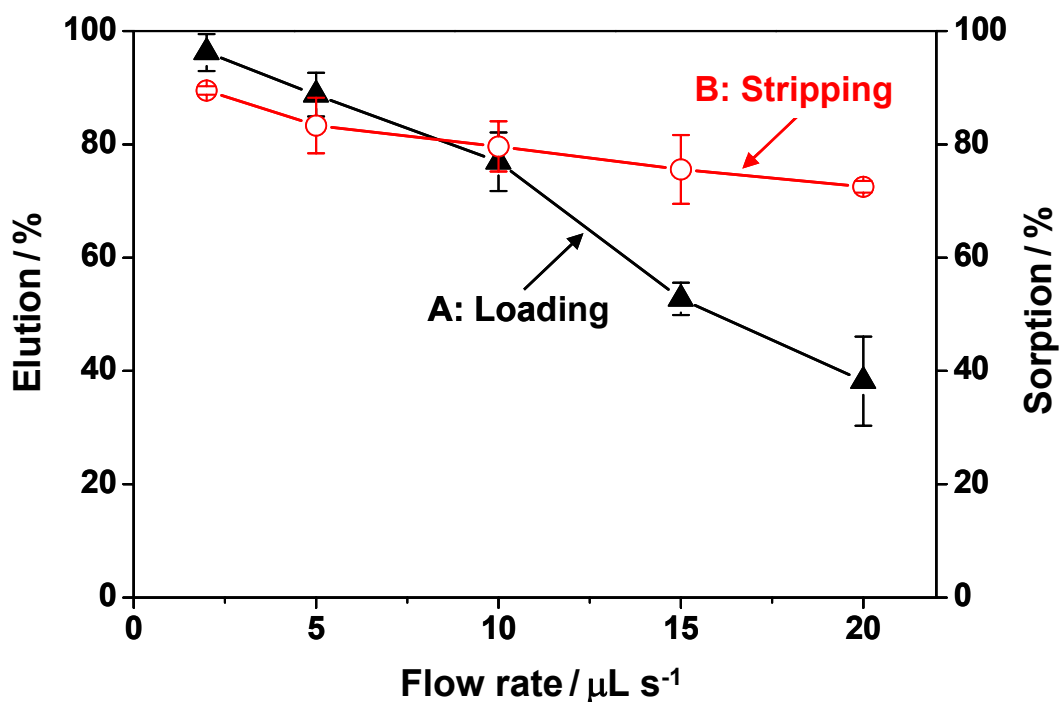

**Fig. S1.** (A) The dependence of adsorption efficiency of Se(VI) on the sampling flow rate and (B) the dependence of elution efficiency of the retained Se(VI) on the elution flow rate. Sample volume: 1000  $\mu\text{L}$ , 1.5  $\mu\text{g L}^{-1}$  Se(VI); Sample loading flow rate: 5.0  $\mu\text{g L}^{-1}$ ; Eluent (0.5 M  $\text{HNO}_3$ ): 50  $\mu\text{L}$ ; Elution flow rate: 5.0  $\mu\text{L s}^{-1}$ .

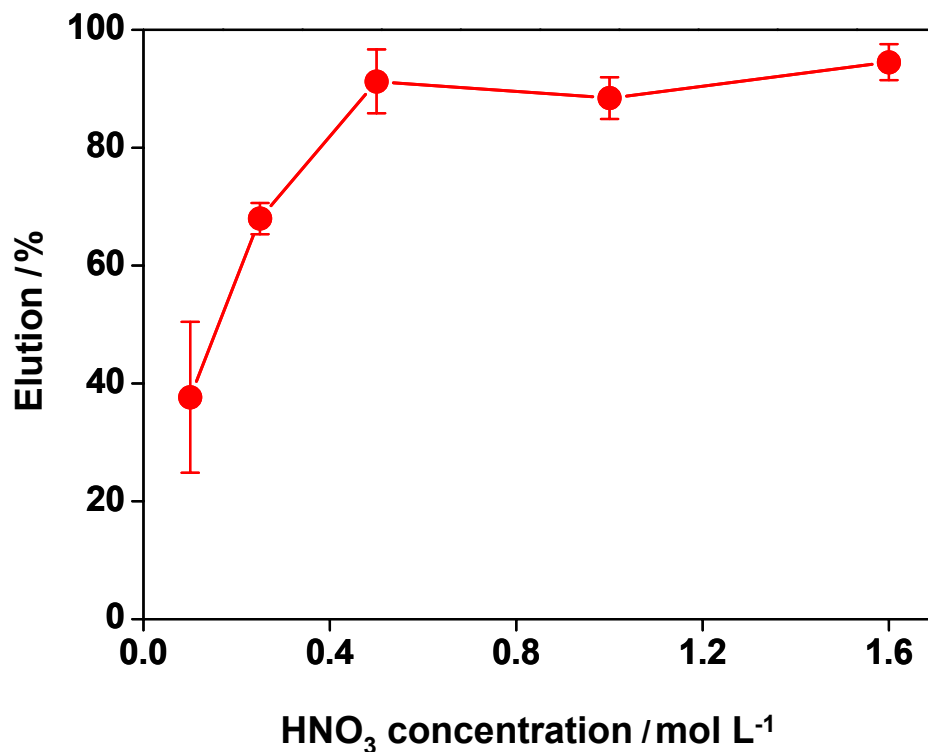

**Fig. S2.** The dependence of elution efficiency of Se(VI) on the concentration of eluent (HNO<sub>3</sub>). Sample volume: 1000  $\mu\text{L}$ , 3.0  $\mu\text{g L}^{-1}$  Se(VI); Sample loading flow rate: 5.0  $\mu\text{g L}^{-1}$ ; Eluent (HNO<sub>3</sub> with various concentrations): 100  $\mu\text{L}$ ; Elution flow rate: 2.0  $\mu\text{L s}^{-1}$ . Note that the % elution refers to the original amount of Se(VI) taken, 89% is retained in the preconcentration process.

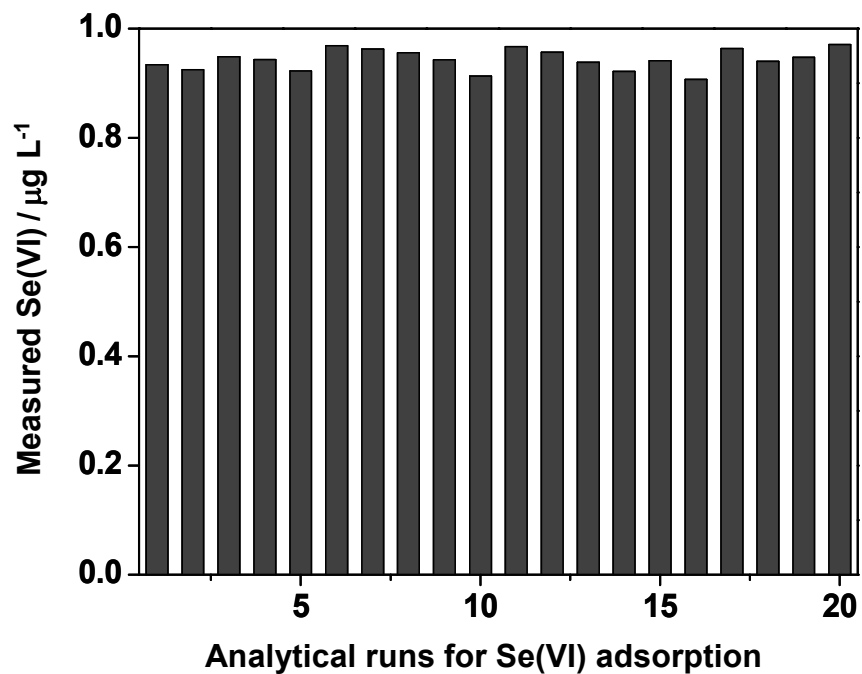

**Fig. S3.** The adsorption of Se(VI) in the presence of Se(IV) retention/Se(0) accumulation on the thio-ESM. Sample: a mixture of 1.0 μg L<sup>-1</sup> Se(IV) and 1.0 μg L<sup>-1</sup> Se(VI), 1000 μL; Sample loading flow rate: 5.0 μg L<sup>-1</sup>; Eluent (0.5 mol L<sup>-1</sup> HNO<sub>3</sub>): 50 μL; Elution flow rate: 2.0 μL s<sup>-1</sup>.
